# Supplementary material
Source: PubMed Central journal article supplement (PMC6187140)
Supplement: pnas.1805668115.sapp.pdf [file pnas.1805668115.sapp.pdf]

Submission to: PNAS

# Rapid stimulation of human dentate gyrus function with acute mild exercise

Kazuya Suwabe <sup>1,2†</sup>, Kyeongho Byun <sup>2,3†</sup>, Kazuki Hyodo <sup>1</sup>, Zachariah M. Reagh <sup>3</sup>, Jared M. Roberts <sup>3</sup>, Akira Matsushita <sup>4</sup>, Kousaku Saotome <sup>4</sup>, Genta Ochi <sup>1</sup>, Takemune Fukuie <sup>1</sup>, Kenji Suzuki <sup>4</sup>, Yoshiyuki Sankai <sup>4</sup>, Michael A. Yassa <sup>2,3\*</sup>, and Hideaki Soya<sup>1,2\*</sup>

## Affiliation:

<sup>1</sup> Laboratory of Exercise Biochemistry and Neuroendocrinology; <sup>2</sup> Department of Sports Neuroscience, Advanced Research Initiative for Human High Performance (ARIHHP), Faculty of Health and Sport Sciences, University of Tsukuba, Ibaraki 305-8574, Japan

<sup>3</sup> Department of Neurobiology and Behavior, Center for the Neurobiology of Learning and Memory, University of California, Irvine, CA, 92697-3800, USA

<sup>4</sup> Center for Cybernetics Research, University of Tsukuba, Ibaraki 305-8574, Japan

† K.S. and K.B. contributed equally to this work.

\*To whom correspondence should be addressed:

Hideaki Soya ([soya.hideaki.gt@u.tsukuba.ac.jp](mailto:soya.hideaki.gt@u.tsukuba.ac.jp))

Michael A. Yassa ([myassa@uci.edu](mailto:myassa@uci.edu))

2 **Supporting information**

3

4 **SI MATERIALS AND METHODS**

5 **Cardiorespiratory fitness assessment**

6 At least 48 h prior to the experiments, participants performed a cardiorespiratory fitness  
7 assessment test to estimate the appropriate individual exercise load corresponding to very light  
8 intensity ( $30\% \dot{V}O_{2peak}$ ) using a recumbent ergometer (Strength-ergo 240, Mitsubishi Electric  
9 Corporation, Japan). After warming up for 3 min at 30 W, the work rate was increased by 20 W  
10 (women: 15 W) per minute in a constant and continuous manner until the subject reached  
11 exhaustion. The pedaling rate was maintained at 60 rpm. Exhaled gas was analyzed using a gas  
12 analyzer (Aeromonitor AE280S, Minato Medical Science, Japan). Heart rate (HR; Polar RS800CX,  
13 Polar, Finland) and Borg's rating of perceived exertion (RPE) (1) was recorded once every minute.  
14  $\dot{V}O_{2peak}$  was defined as the value of  $VO_2$  when at least two of the following criteria were satisfied:  
15 (1) the respiratory exchange ratio exceeded 1.05, (2) 90% of age-predicted peak HR ( $220 - \text{age}$ )  
16 was achieved, and (3) the RPE score was 19 or 20.

17

18 **Mood scale**

19 Psychological mood (arousal and pleasure) was measured using the Two-Dimensional Mood  
20 Scale (TDMS) before and after the intervention as well as after the study session (2). The TDMS  
21 is a psychometric scale comprising eight mood-expressing words describing both pleasure and  
22 arousal states (energetic, lively, lethargic, listless, relaxed, calm, irritated, and nervous).  
23 Participants were asked to indicate how they were feeling at the time according to a six-point  
24 Likert-type scale ranging from 0 = "Not at all" to 5 = "Extremely". Levels of arousal and pleasure  
25 at that point were calculated from these TDMS scores (range: -20 to 20).

26

27 **Saliva sampling and alpha-amylase and cortisol measurements**

28 Saliva was collected in sterile tubes using the “passive drool” method. The saliva samples were  
29 immediately placed in a freezer and stored at  $-80^{\circ}\text{C}$  for a minimum of 24 h to allow the mucins to  
30 precipitate. The samples were then thawed and centrifuged at 4100 rpm for 15 min to extract  
31 particulates from the saliva (LC-120, Tomy, Japan). The clear supernatant was transferred to  
32 another sterile tube and stored at  $-80^{\circ}\text{C}$  until assayed. On the day of the assay, the saliva  
33 samples were thawed and centrifuged at 4100 rpm for 15 min before the assay. Alpha-amylase  
34 activity levels were determined by enzyme kinetic assay (Salimetrics, State College, PA, USA).  
35 Cortisol levels were measured by expanded range enzyme immunoassay (Salimetrics).

### 36 **Continuous version of the mnemonic discrimination task (Experiment 2)**

37 We adopted a continuous mnemonic discrimination task (3). The paradigm was an explicit three-  
38 alternative forced choice task in which the participants were instructed to judge whether the  
39 presented item was “old”, “similar”, or “new” by pressing buttons located near the right hand. Each  
40 participant completed four functional runs, each comprising 24 similar pairs, 24 identical pairs,  
41 and 48 unrelated novel items (foils), which were fully randomized throughout the run (Fig. S1).  
42 The presented stimuli (photographs of items) were collected from the same pool as in Experiment  
43 1. The number of trials separating similar and identical pairs was randomly varied between 10  
44 and 40. Each stimulus was presented for 2000 ms with a 500-ms interstimulus interval. The lure  
45 discrimination performance was assessed by the same calculation,  $\text{LDI} = p(\text{'similar'}|\text{lure}) - p$   
46  $(\text{'similar'}|\text{new})$ , as in Experiment 1. We used the stimulus delivery and experiment control program  
47 Presentation (<https://www.neurobs.com>) to present stimuli and collect behavioral data.

48

### 49 **fMRI data preprocessing and cross-participant alignment**

50 Preprocessing of neuroimaging data and univariate analyses were performed using the Analysis  
51 for Functional NeuroImaging (AFNI; <https://afni.nimh.nih.gov/>) software (4). Images were  
52 corrected for slice timing (3dTshift) and subject motion (3dvolreg), as well as global spikes in

53 signal (3dDespike). The time-points in which a significant motion event occurred (>3° of rotation  
54 or 2-mm translation in any direction prior to acquisition), and the previous and subsequent  
55 repetition times were censored and removed from further analyses. Additionally, functional  
56 images were masked to exclude voxels outside the brain (3dAutomask) and then smoothed  
57 (3dmerge) to 2 mm using a Gaussian full-width at half-maximum kernel. Functional images were  
58 then coregistered to the structural MRI scan using AFNI's align\_epi\_anat.py routine. High-  
59 resolution structural scans (0.65-mm isotropic) were aligned to an anatomical template based on  
60 the entire sample using Advanced Normalization Tools (ANTs) (5), which use a nonlinear  
61 registration algorithm called Symmetric Image Normalization (6) to warp each individual  
62 participant's MPRAGE structural scan into the template space. The transformation parameters  
63 were then applied to the coplanar functional data using an in-house shell script to wrap basic ANT  
64 functions (code available upon request). We defined the regions of interest (ROIs) in the medial  
65 temporal lobe and hippocampus according to the atlas of (7) and our previous work (8, 9).  
66 Hippocampal ROIs included the bilateral combined DG/CA3, CA1, and subiculum subregions.  
67 Cortical ROIs included the bilateral temporopolar cortex, entorhinal cortex (EC), perirhinal cortex  
68 (PRC), and parahippocampal cortex (PHC). In addition, we used the same template to add the  
69 amygdala. ROI masks were resampled to match the resolution of the smoothed fMRI data (2-mm  
70 isotropic) and further eroded to exclude partially sampled voxels within and across runs (3dcalc).

#### References:

- 71 1. Borg GA (1982) Psychophysical bases of perceived exertion. *Med Sci Sports Exerc*  
72 14(5):377–81.
- 73 2. Sakairi Y, Nakatsuka K, Shimizu T (2013) Development of the Two-Dimensional Mood  
74 Scale for self-monitoring and self-regulation of momentary mood states. *Jpn Psychol Res*  
75 55(4):338–349.

- 76 3. Yassa MA, et al. (2010) High-resolution structural and functional MRI of hippocampal  
77 CA3 and dentate gyrus in patients with amnesic Mild Cognitive Impairment. *Neuroimage*  
78 51(3):1242–1252.
- 79 4. Cox RW (1996) AFNI: software for analysis and visualization of functional magnetic  
80 resonance neuroimages. *Comput Biomed Res* 29(3):162–73.
- 81 5. Avants B, et al. (2008) Multivariate Analysis of Structural and Diffusion Imaging in  
82 Traumatic Brain Injury. *Acad Radiol* 15(11):1360–1375.
- 83 6. Klein A, et al. (2009) Evaluation of 14 nonlinear deformation algorithms applied to human  
84 brain MRI registration. *Neuroimage* 46(3):786–802.
- 85 7. Duvernoy H (1998) *The human hippocampus* (Springer-Verlag).
- 86 8. Reagh ZM, Watabe J, Ly M, Murray E, Yassa MA (2014) Dissociated signals in human  
87 dentate gyrus and CA3 predict different facets of recognition memory. *J Neurosci*  
88 34(40):13301–13.
- 89 9. Yushkevich P a., et al. (2015) Quantitative comparison of 21 protocols for labeling  
90 hippocampal subfields and parahippocampal subregions in in vivo MRI: Towards a  
91 harmonized segmentation protocol. *Neuroimage*:1–16.

92

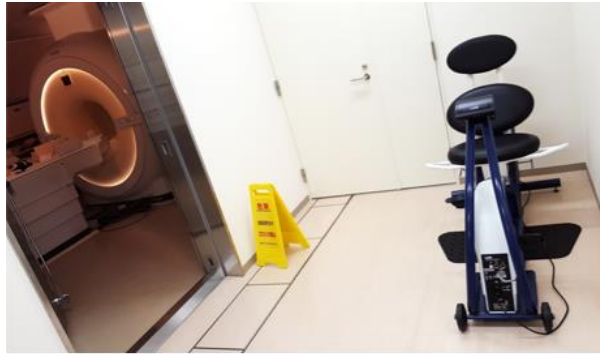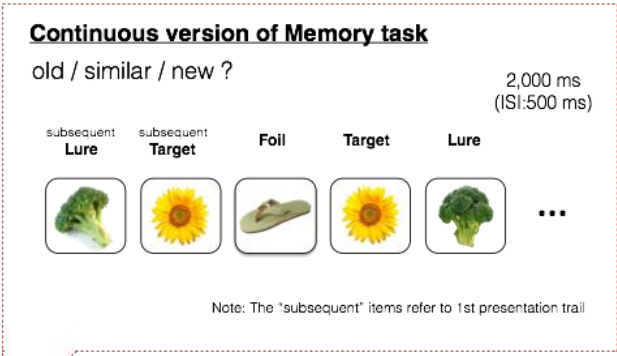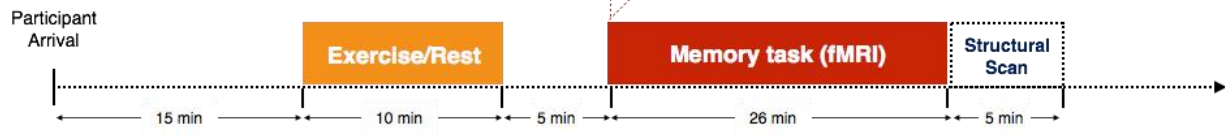

93

94 **Fig. S1.**

95 Mnemonic discrimination task and experimental procedure (Experiment 2).

96

97

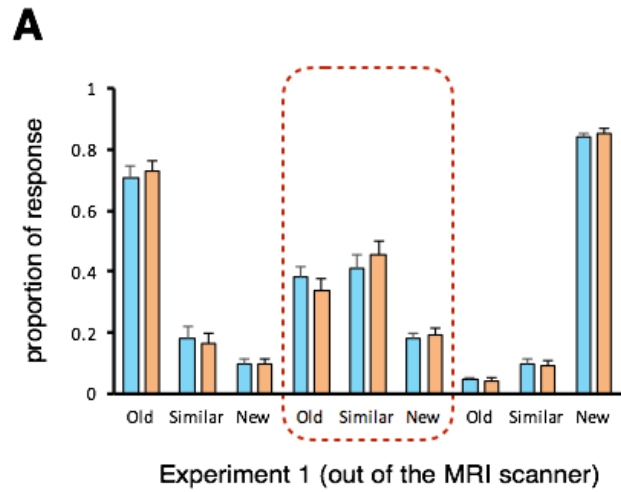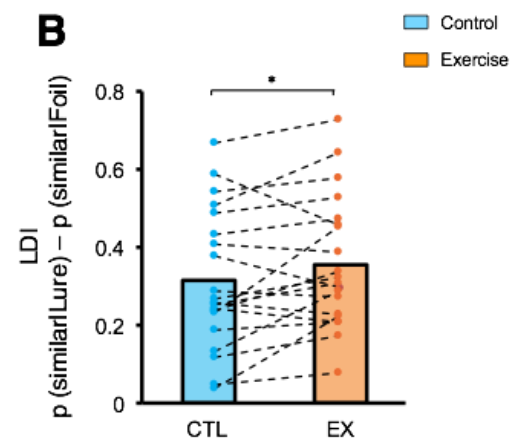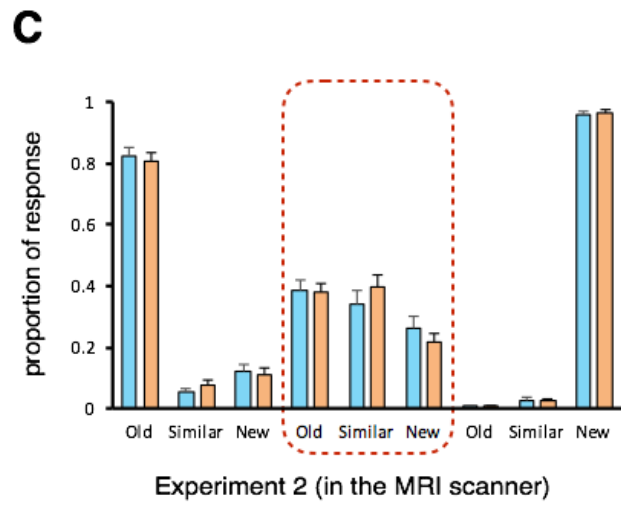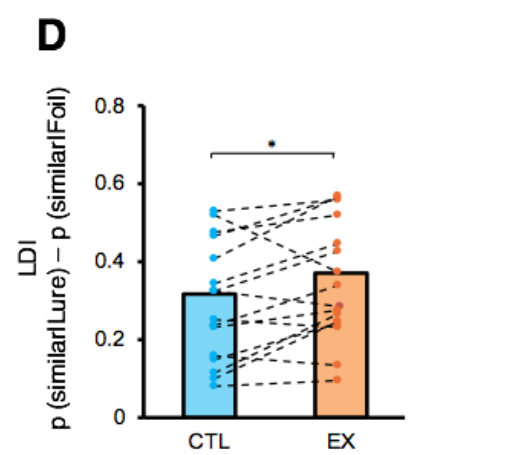

98

99 **Fig. S2.**

100 Overall task performance and behavioral improvement with mild exercise.

101

102

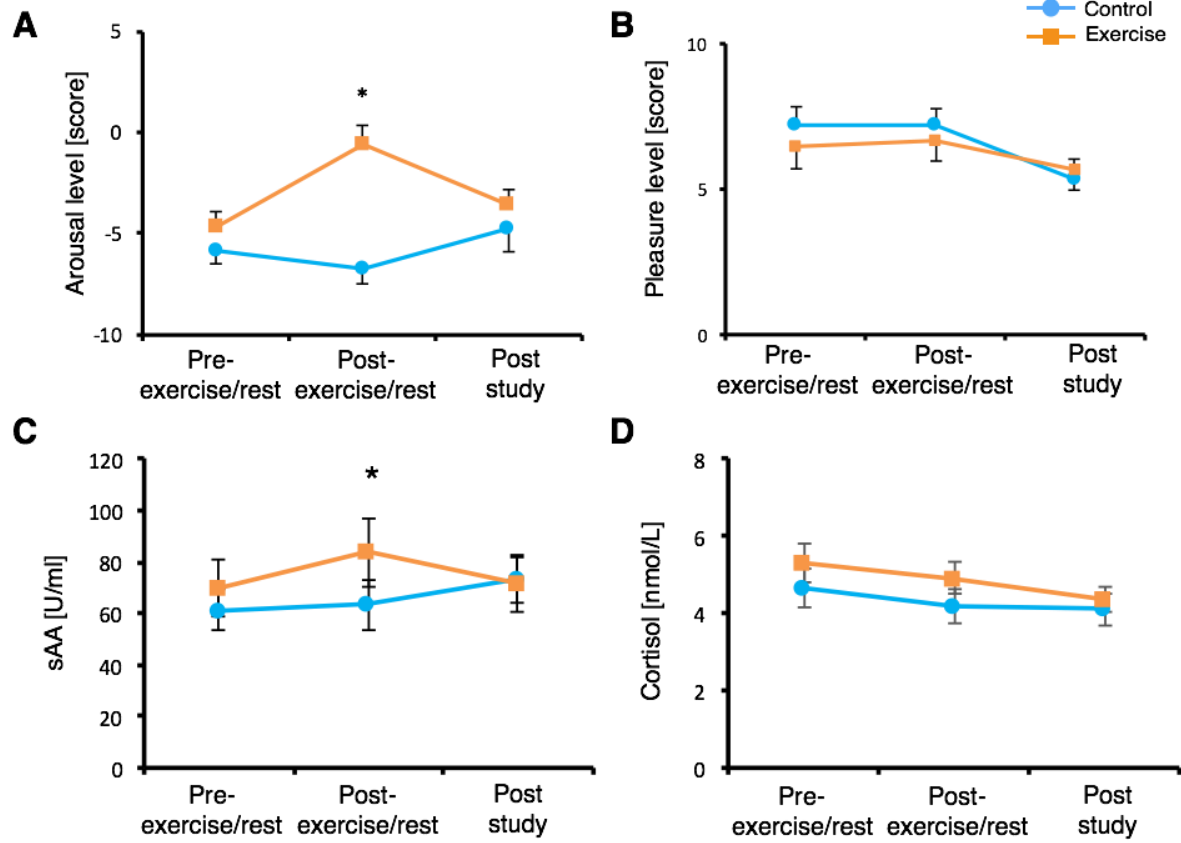

103

104

105 **Fig. S3.**

106 Mood (arousal, pleasure), salivary alpha-amylase, and cortisol responses.

107



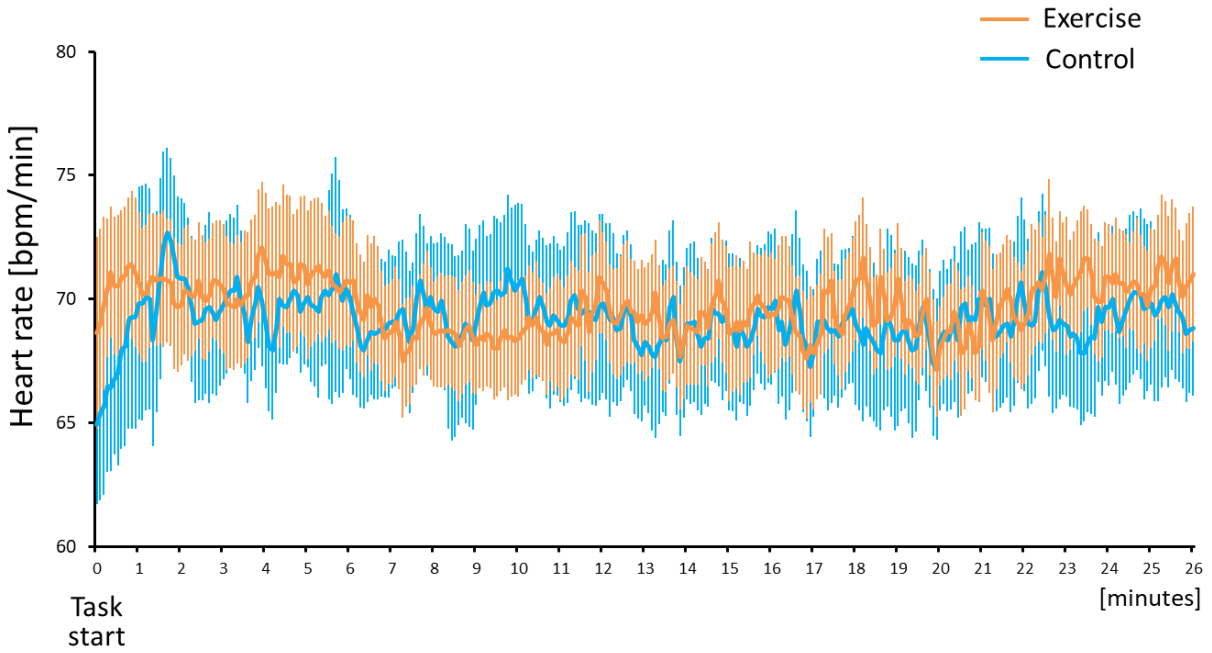

108

109 **Fig. S4.**

110 Heart rate response during functional imaging (mean  $\pm$  SE).

111

112

A. Regions showing positive correlation with DG/CA3

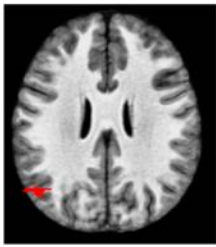

Angular gyrus (left)

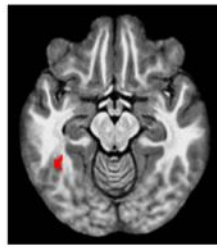

Fusiform gyrus (left)

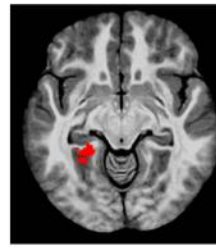

Parahippocampal cortex (left)

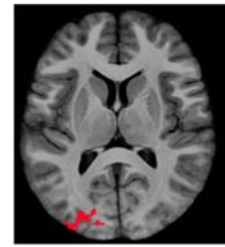

Primary visual cortex (left)

B. Region showing negative correlation with DG/CA3

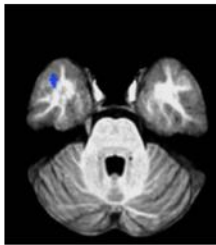

Temporal pole (left)

113

114 **Fig. S5.**

115 Results of the PPI analysis

116

117

118 **Table S1.**

119 Participant demographic and physiological characteristics.

120 Note: BMI=Body Mass Index; BDI=Beck Depression Inventory; VO<sub>2</sub>peak=peak oxygen uptake;

121 HR=heart rate; RAVLT= Rey Auditory Verbal Learning Test; RPE=rating of perceived exertion;

122 WR=work road. Values are mean (SD).

123

| Measure                         | Experiment 1 (Behavioral) |              |              | Experiment 2 (fMRI) |              |              |
|---------------------------------|---------------------------|--------------|--------------|---------------------|--------------|--------------|
|                                 | All                       | Men          | Women        | All                 | Men          | Women        |
| Sample Size                     | 20                        | 12           | 8            | 16                  | 4            | 12           |
| Age[yr]                         | 20.6(1.73)                | 20.8(1.52)   | 20.0(2.08)   | 21.1(2.00)          | 20.8(2.06)   | 21.3(2.05)   |
| Height [cm]                     | 166.7(6.42)               | 170.4(4.55)  | 160.0(2.81)  | 164.2(9.12)         | 176.1(8.03)  | 160.3(5.25)  |
| Weight [kg]                     | 59.7(13.78)               | 64.9(14.55)  | 49.8(2.33)   | 55.4(7.74)          | 64.7(7.10)   | 52.3(5.12)   |
| BMI [kg/m <sup>2</sup> ]        | 21.3(3.88)                | 22.3(4.51)   | 19.5(0.92)   | 20.5(1.56)          | 20.8(0.62)   | 20.4(1.78)   |
| BDI-2                           | 7.3(5.33)                 | 8.8(5.86)    | 4.9(3.48)    | 4.4(3.88)           | 7.3(3.77)    | 3.5(3.58)    |
| RAVLT (Total learning)          | 56.4(6.24)                | 55.5(5.65)   | 57.9(7.29)   | 56.9(5.97)          | 52.3(5.32)   | 58.4(5.52)   |
| RAVLT (Immediate recall)        | 12.5(1.92)                | 12.7(1.74)   | 12.1(2.27)   | 12.2(1.72)          | 11.8(2.22)   | 12.3(1.61)   |
| RAVLT (Delayed recall)          | 12.0(2.30)                | 12.1(1.87)   | 11.9(3.02)   | 11.9(1.73)          | 11.8(2.22)   | 12.0(1.65)   |
| Graded exercise test            |                           |              |              |                     |              |              |
| VO <sub>2peak</sub> [ml/kg/min] | 40.5(7.60)                | 42.5(8.40)   | 36.8(4.18)   | 37.9(8.21)          | 50.0(3.55)   | 33.8(4.09)   |
| HR <sub>peak</sub> [bpm]        | 175.5(13.40)              | 176.0(11.43) | 174.6(17.25) | 172.2(10.22)        | 173.0(7.39)  | 171.9(11.28) |
| RPE <sub>peak</sub>             | 19.2(1.39)                | 19.5(0.66)   | 18.4(2.07)   | 19.4(0.89)          | 19.8(0.50)   | 19.3(0.97)   |
| WR <sub>peak</sub>              | 202.3(48.39)              | 229.7(34.77) | 151.4(18.74) | 179.3(50.47)        | 258.8(23.23) | 152.8(16.18) |
| Exercise condition              |                           |              |              |                     |              |              |
| HR [bpm]                        | 100.3(6.93)               | 99.4(7.30)   | 101.9(6.40)  | 102.0(8.64)         | 106.4(9.13)  | 100.5(8.34)  |
| RPE                             | 10.4(2.11)                | 10.2(1.88)   | 10.6(2.64)   | 10.6(1.31)          | 11.3(0.96)   | 10.3(1.37)   |
| WR                              | 46.4(17.04)               | 50.3(15.65)  | 31.8(7.15)   | 38.4(15.59)         | 62.5(2.65)   | 30.4(6.97)   |

124

125

126
